# Supplementary figures and images for: Kinesin-73 Is a Processive Motor That Localizes to Rab5-containing Organelles
Source: PubMed Central journal article supplement — J Biol Chem. 2010 Dec 18;286(9):7457–67. doi: 10.1074/jbc.M110.167023 (PMC3045001; doi:10.1074/jbc.m110.167023), 2010-12-18

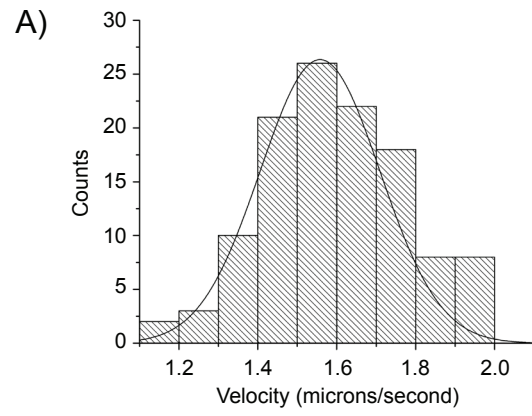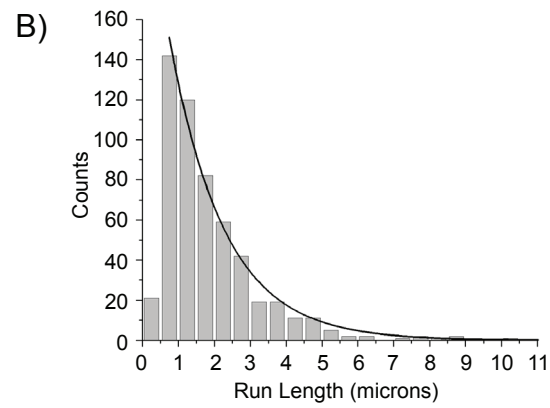

Supplement: supp_M110.167023_jbc.M110.167023-2.pdf [file supp_M110.167023_jbc.M110.167023-2.pdf]

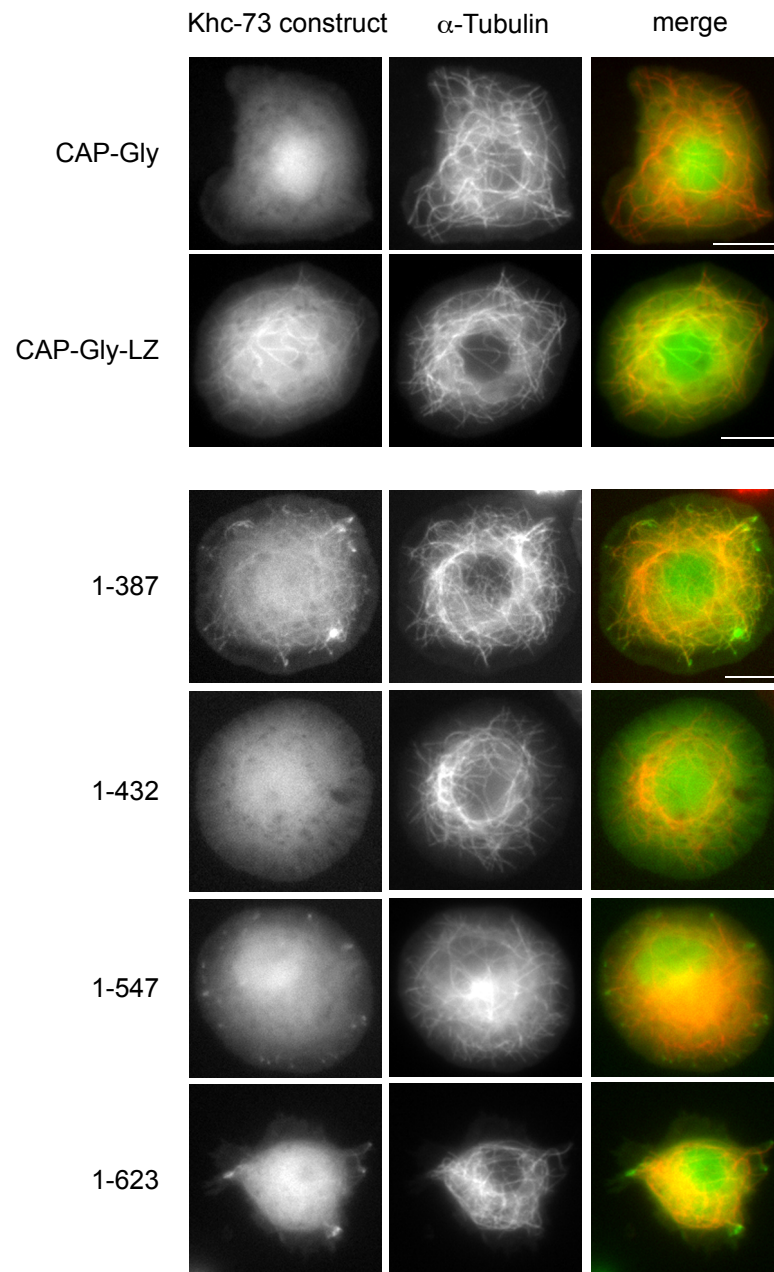

Supplement: supp_M110.167023_jbc.M110.167023-3.pdf [file supp_M110.167023_jbc.M110.167023-3.pdf]

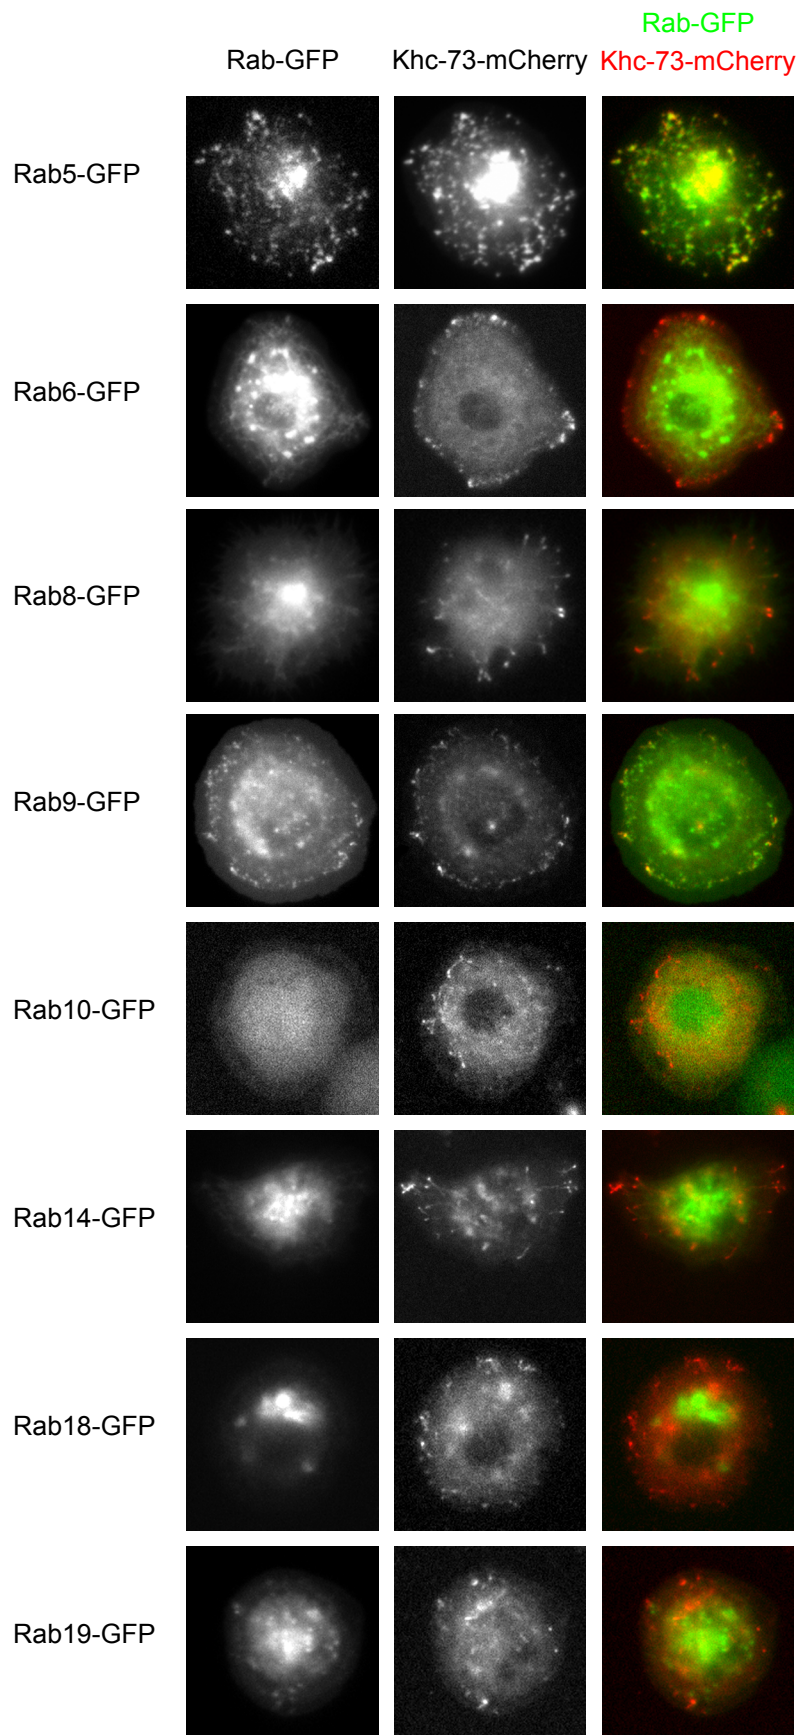

Supplement: supp_M110.167023_jbc.M110.167023-4.pdf [file supp_M110.167023_jbc.M110.167023-4.pdf]

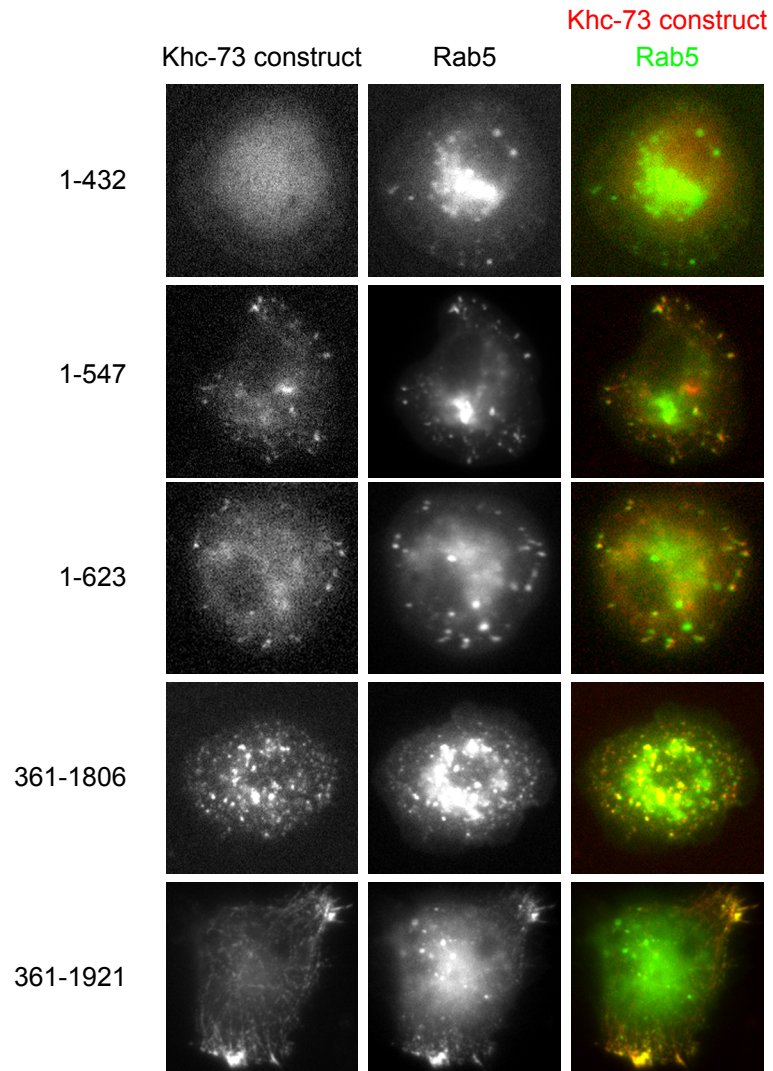

Supplement: supp_M110.167023_jbc.M110.167023-5.pdf [file supp_M110.167023_jbc.M110.167023-5.pdf]

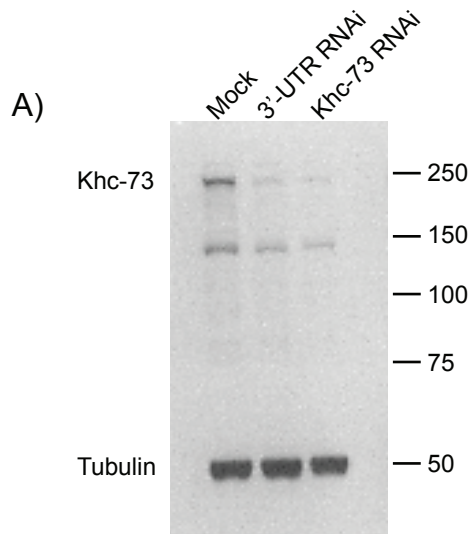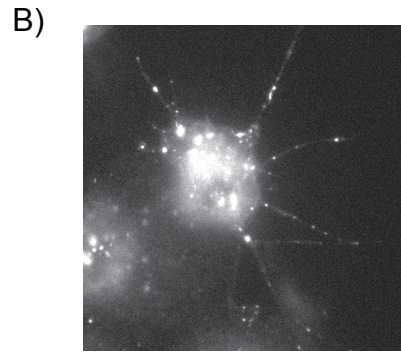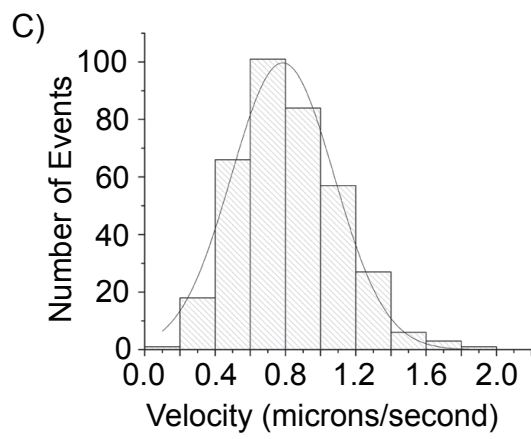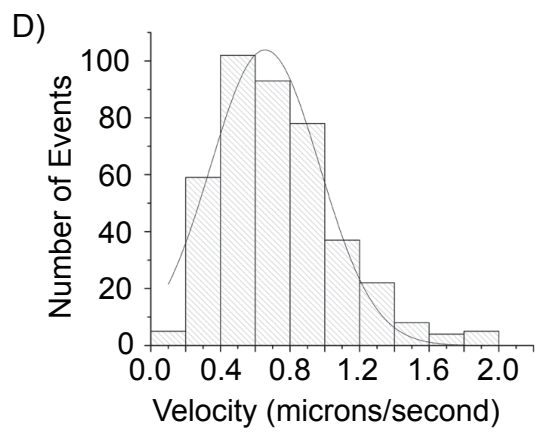

Supplement: supp_M110.167023_jbc.M110.167023-6.pdf [file supp_M110.167023_jbc.M110.167023-6.pdf]

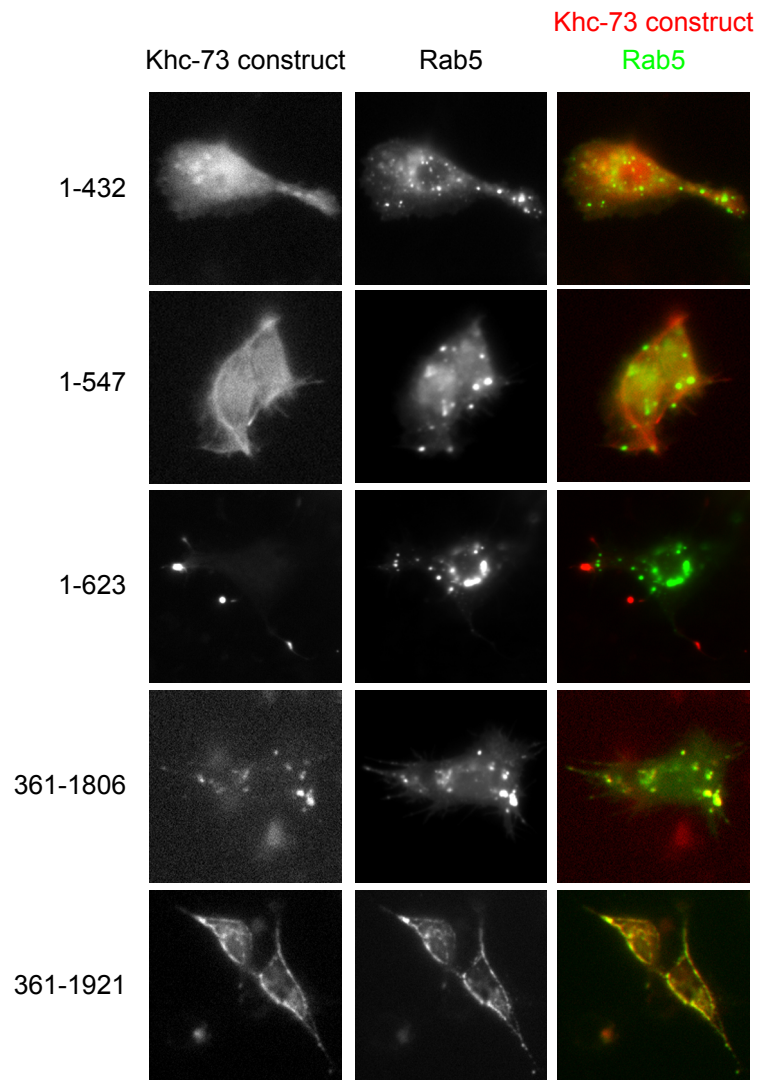

Supplement: supp_M110.167023_jbc.M110.167023-7.pdf [file supp_M110.167023_jbc.M110.167023-7.pdf]
